# Supplementary material for: CUT&Tag applied to zebrafish adult tail fins reveals a return of embryonic H3K4me3 patterns during regeneration
Source: PubMed Central journal article supplement (PMC11264793; doi:10.1186/s13072-024-00547-5), 2024-07-20

Supplementary Figure 1

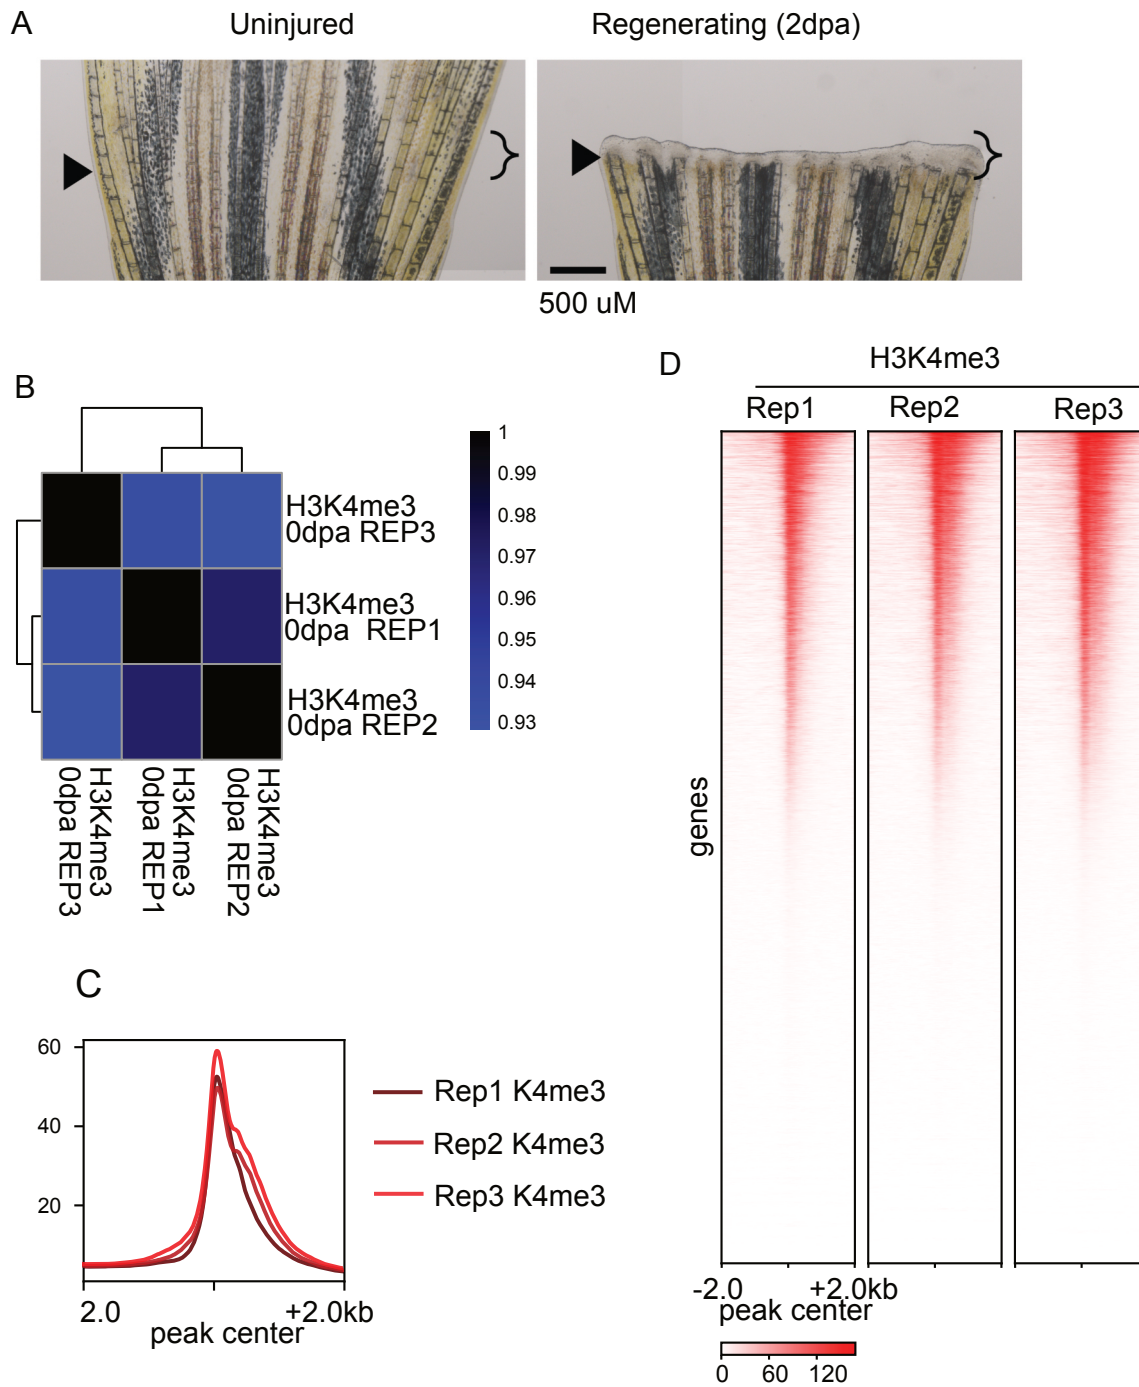

# Supplementary Figure 2

A

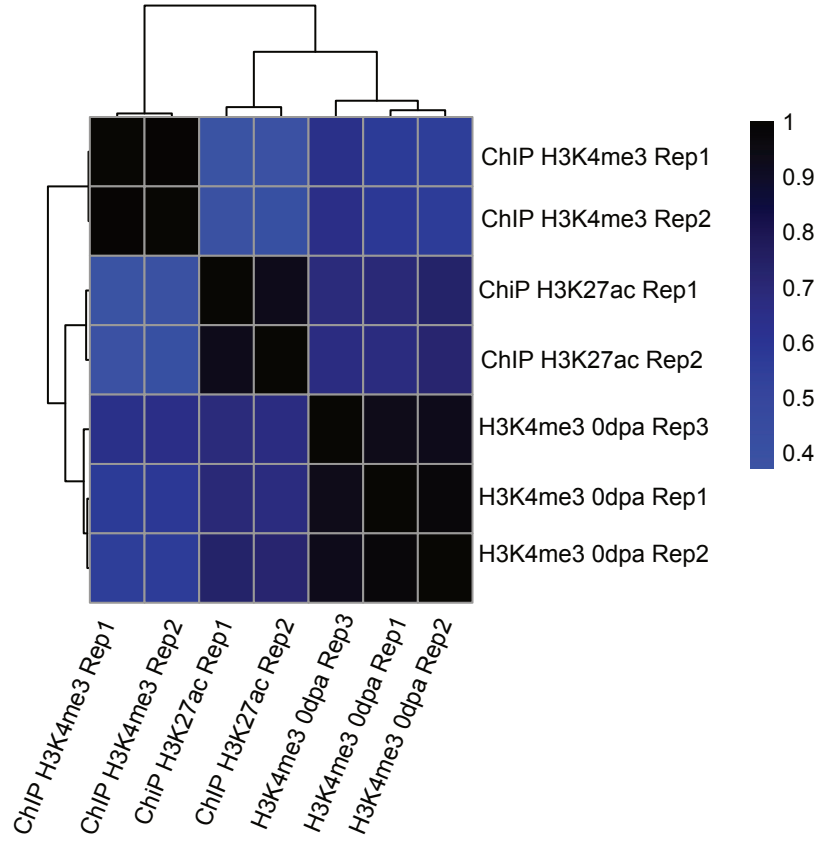

B

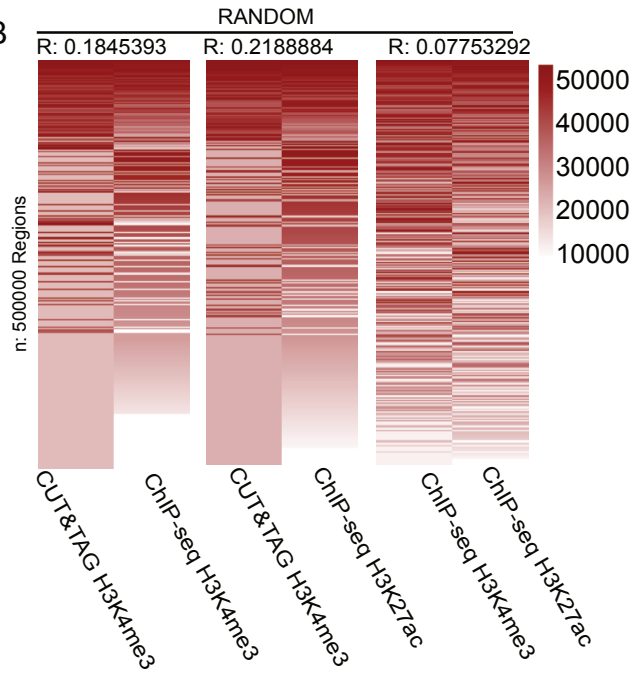

# Supplementary Figure 3

A

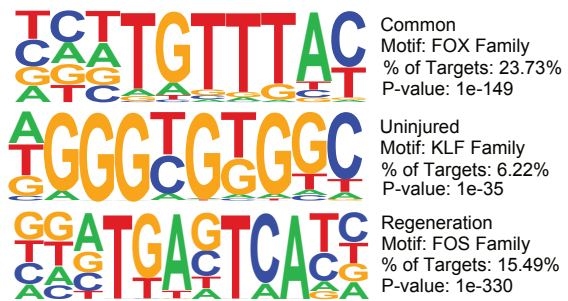

B

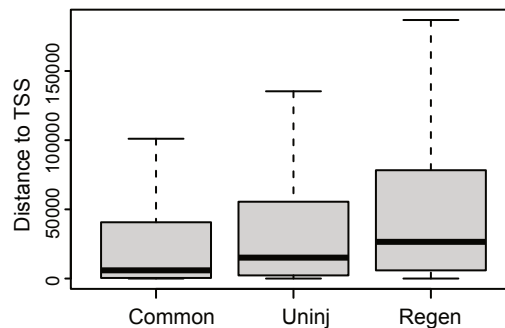

C

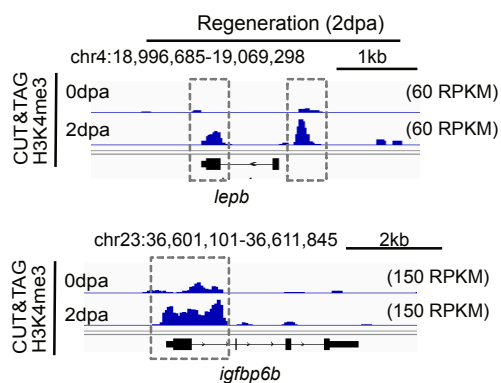

# Supplementary Figure 4

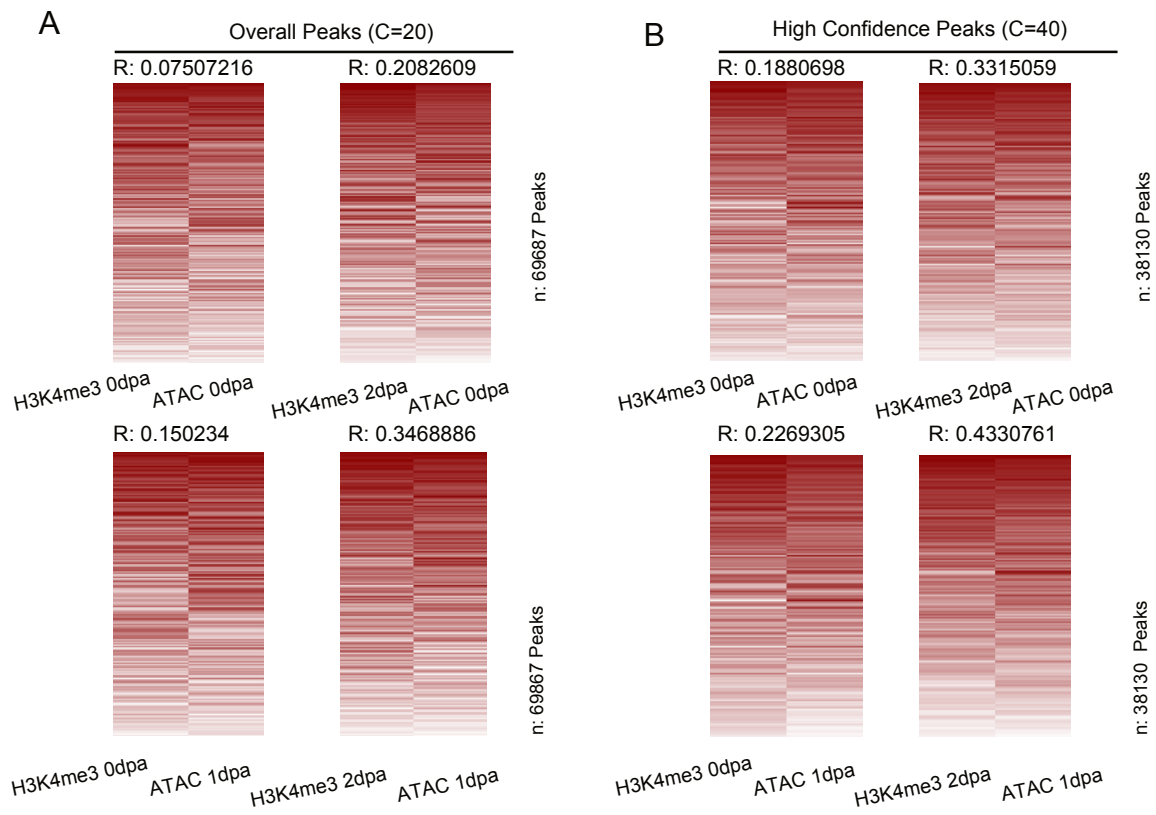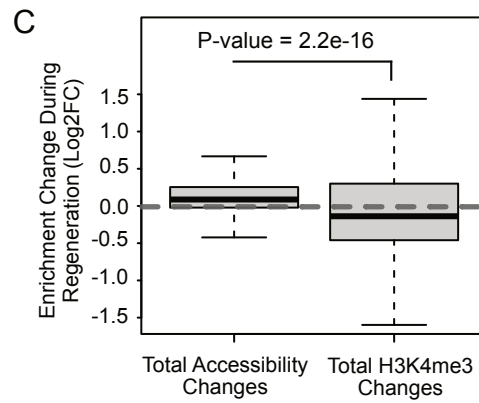

# Supplementary Figure 5.

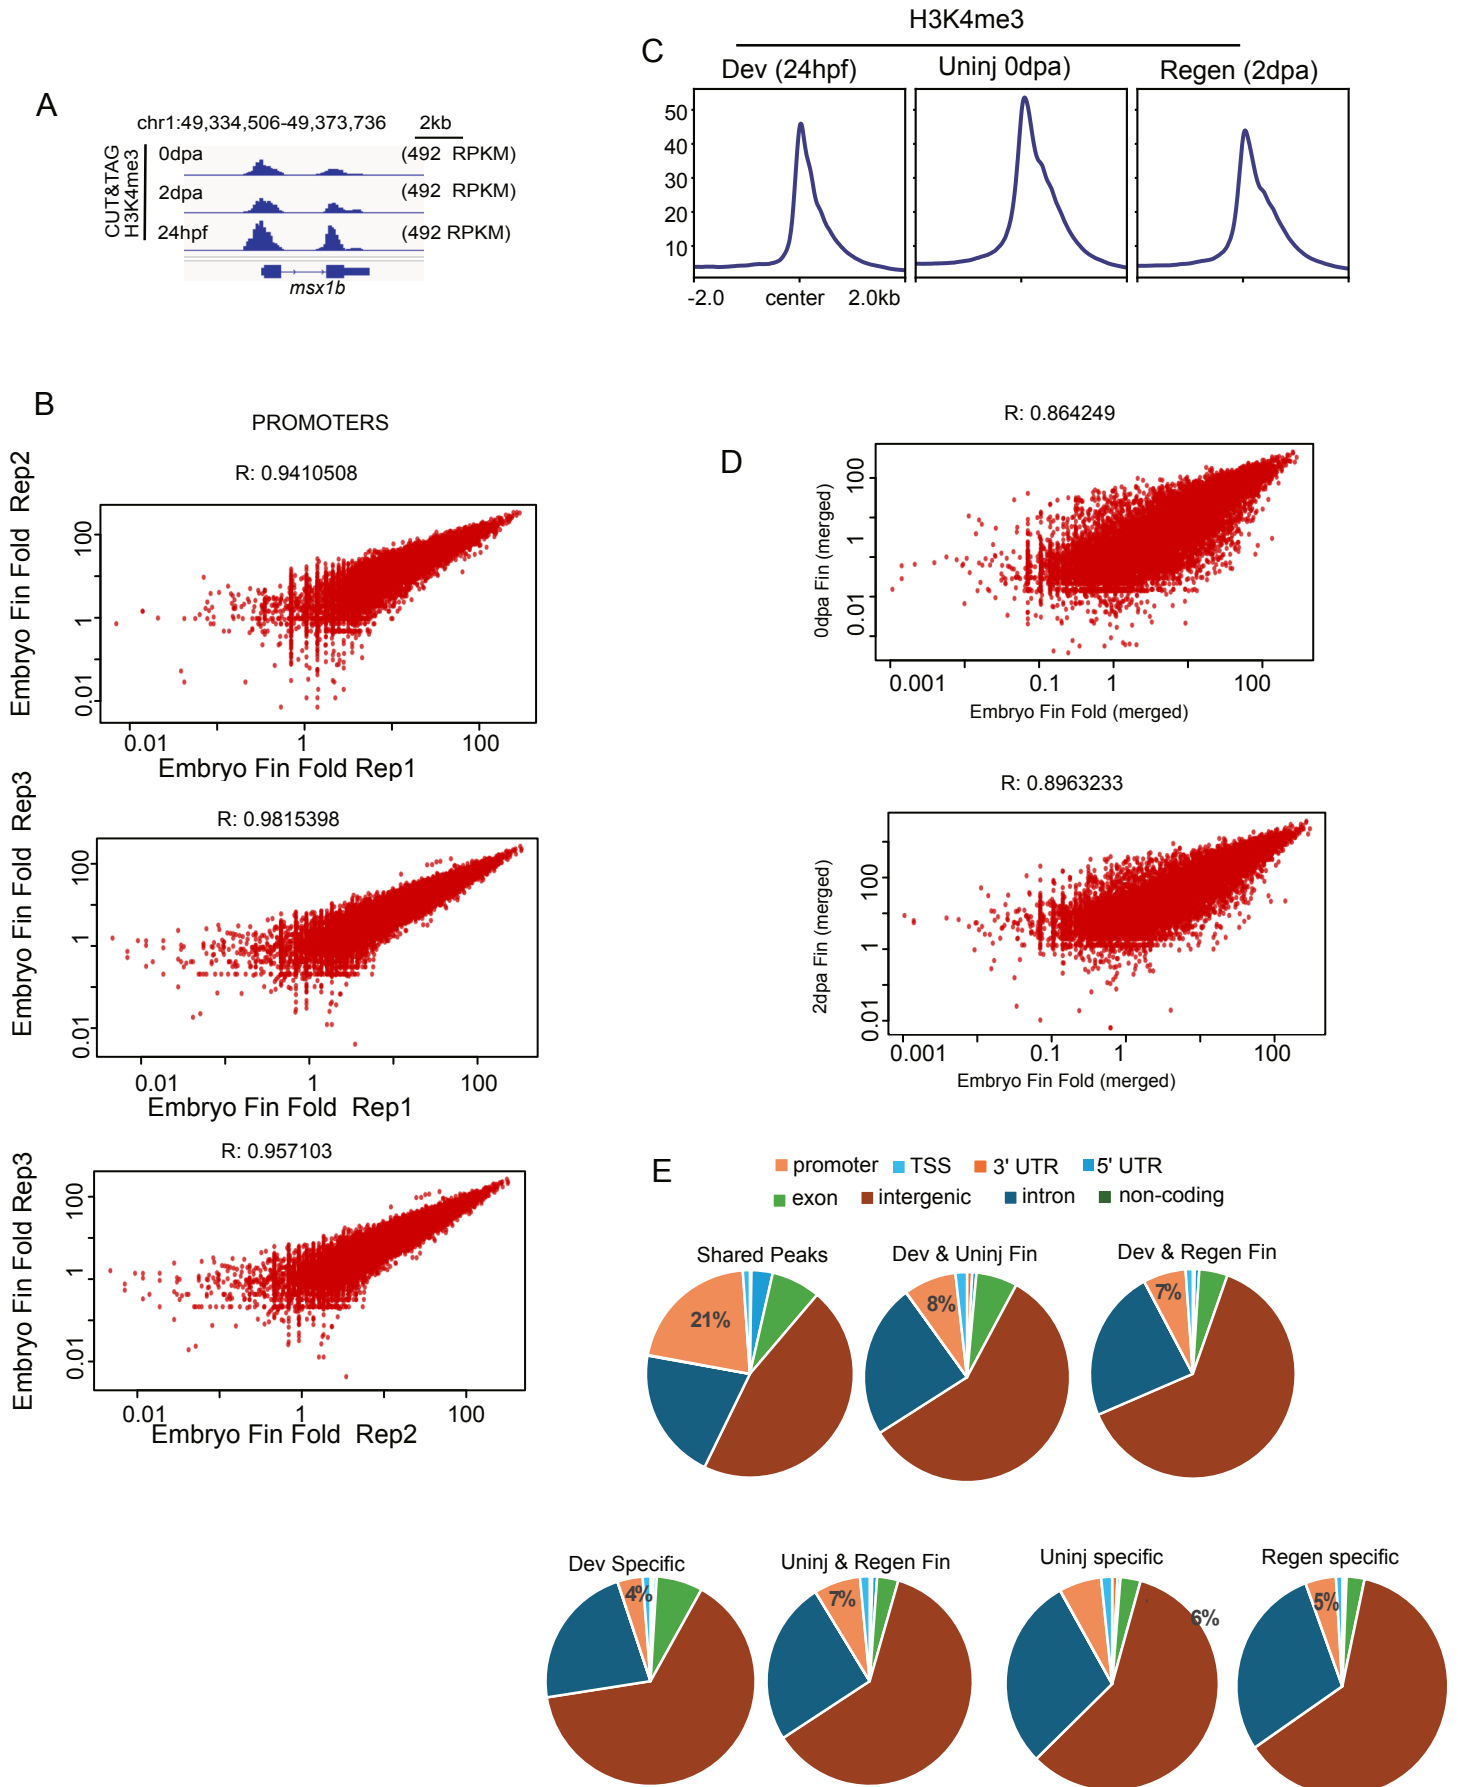

Supplementary Figure 6.

A

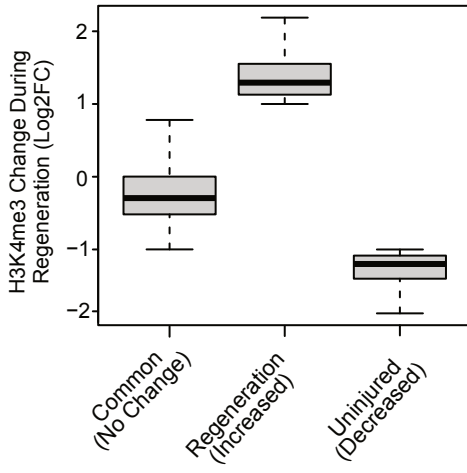

B

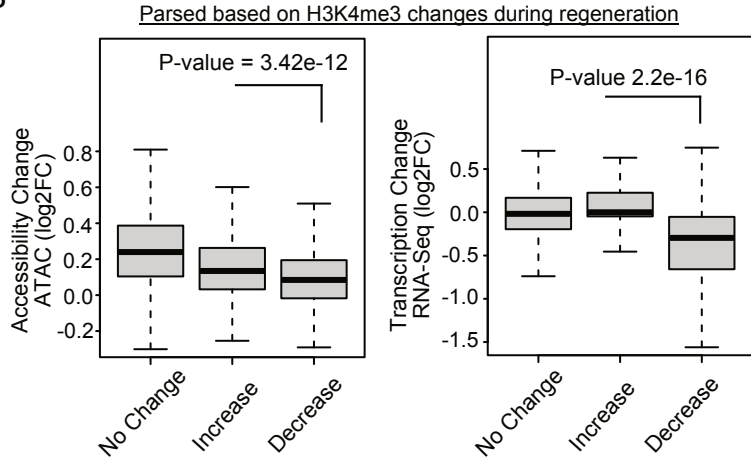

C

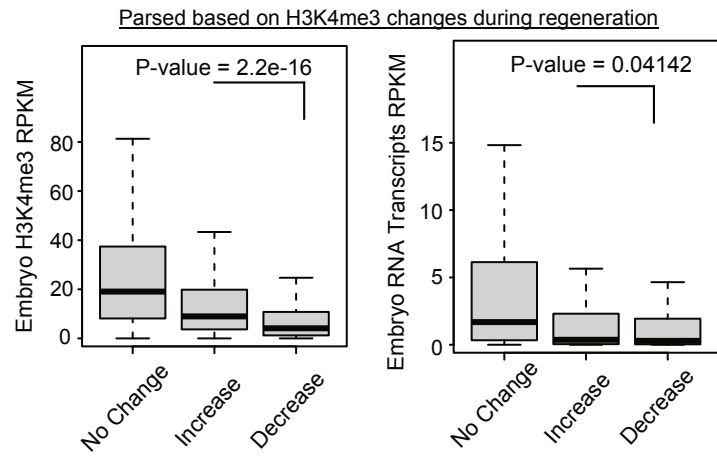

Supplement: 13072_2024_547_MOESM1_ESM.pdf [file 13072_2024_547_MOESM1_ESM.pdf]
